# Supplementary material for: Assessment of midwifery care providers intrapartum care competencies, in four sub-Saharan countries: a mixed-method study protocol
Source: PubMed Central journal article supplement (PMC7912468; doi:10.1186/s12978-021-01109-8), 2021-02-27
Supplement: 12978_2021_1109_MOESM2_ESM.pdf [file 12978_2021_1109_MOESM2_ESM.pdf]

Additional file 2.

The ICM Essential Competencies for Midwifery Practice Framework – Topic related to care during labour and childbirth.

Competencies in this category are about assessment and care of women during labour that facilitates physiological processes and a safe birth, the immediate care of the newborn infant, detection of complications in mother or infant, stabilisation of emergencies, and referral as needed.

Source: The International Confederation of Midwives (ICM) Essential Competencies for Midwifery Practice, 2019 update. [Available from: <https://www.internationalmidwives.org/our-work/policy-and-practice/essential-competencies-for-midwifery-practice.html>].

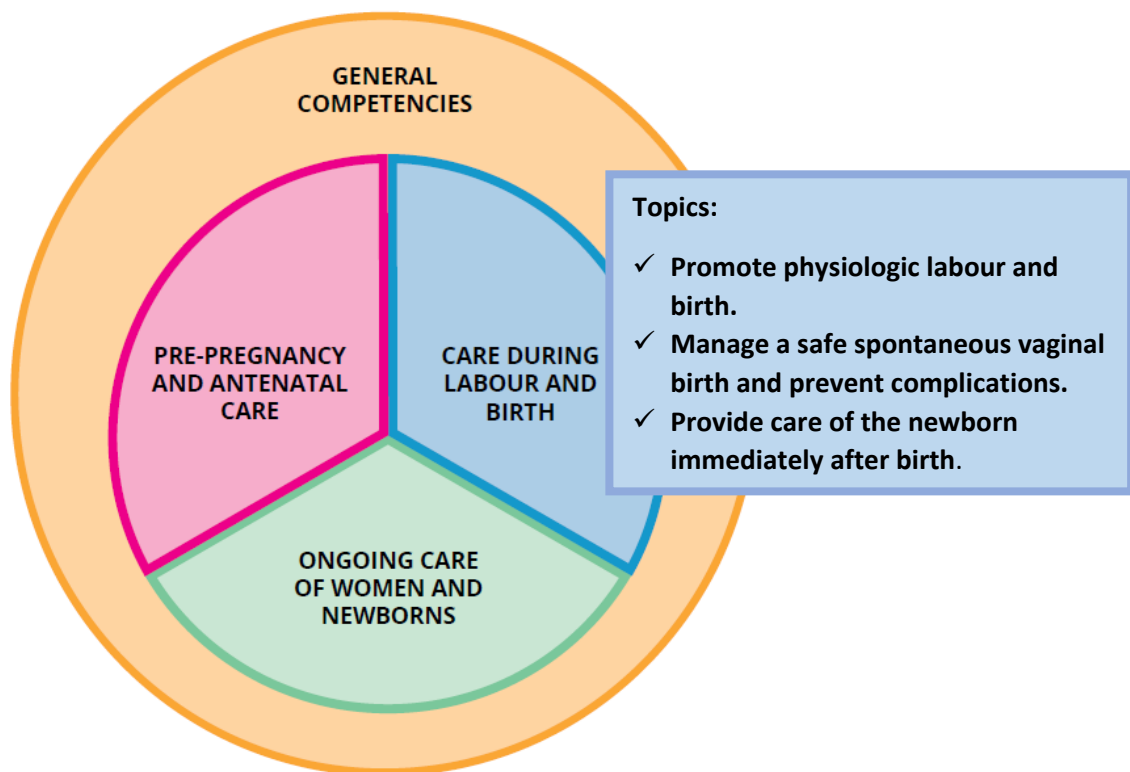

## Knowledge, skills and behaviours according to ICM Essential Competencies

| <b>Subject/topics</b><br><i>Promote physiologic labour and birth</i>                         |                                                                                                                                                                                                                                                                                                                                                                                                                                                                                                                                                                                                                                                                                                                                                                                                                                                                                                                                                                                                                                                                                                                                                                                                                                                                                                                                                                                                                                                              |
|----------------------------------------------------------------------------------------------|--------------------------------------------------------------------------------------------------------------------------------------------------------------------------------------------------------------------------------------------------------------------------------------------------------------------------------------------------------------------------------------------------------------------------------------------------------------------------------------------------------------------------------------------------------------------------------------------------------------------------------------------------------------------------------------------------------------------------------------------------------------------------------------------------------------------------------------------------------------------------------------------------------------------------------------------------------------------------------------------------------------------------------------------------------------------------------------------------------------------------------------------------------------------------------------------------------------------------------------------------------------------------------------------------------------------------------------------------------------------------------------------------------------------------------------------------------------|
| <b>Knowledge</b>                                                                             | <b>Skills and behaviours</b>                                                                                                                                                                                                                                                                                                                                                                                                                                                                                                                                                                                                                                                                                                                                                                                                                                                                                                                                                                                                                                                                                                                                                                                                                                                                                                                                                                                                                                 |
| Anatomy of maternal pelvis and fetus; mechanisms of labour for different fetal presentations | <ul style="list-style-type: none"> <li>• Provide care for a woman in the birth setting of her choice, following policies and protocols</li> <li>• Obtain relevant obstetric and medical history</li> <li>• Perform and interpret focused physical examination of the woman and fetus</li> <li>• Order and interpret laboratory tests if needed</li> <li>• Assess woman's physical and behavioural responses to labour</li> <li>• Provide information, support, and encouragement to woman and support persons throughout labour and birth</li> <li>• Provide respectful one-to-one care</li> <li>• Encourage freedom of movement and upright positions</li> <li>• Provide nourishment and fluids</li> <li>• Offer and support woman to use strategies for coping with labour pain, e.g. controlled breathing, water immersion, relaxation, massage, and pharmacologic modalities when needed</li> <li>• Assess regularly parameters of maternal-fetal status, and e.g. vital signs, contractions, cervical changes, and fetal descent</li> <li>• Use labour progress graphic display to record findings and assist in detecting labour delay or other complications</li> <li>• Augment uterine contractility judiciously using non-pharmacological or pharmacological agents to prevent non-progressive labour</li> <li>• Prevent unnecessary routine interventions, e.g. amniotomy, electronic fetal monitoring, directed closed glottis pushing</li> </ul> |
| Physiologic onset and progression of labour                                                  |                                                                                                                                                                                                                                                                                                                                                                                                                                                                                                                                                                                                                                                                                                                                                                                                                                                                                                                                                                                                                                                                                                                                                                                                                                                                                                                                                                                                                                                              |
| Evidence about interventions in normal labour and birth                                      |                                                                                                                                                                                                                                                                                                                                                                                                                                                                                                                                                                                                                                                                                                                                                                                                                                                                                                                                                                                                                                                                                                                                                                                                                                                                                                                                                                                                                                                              |
| Cultural and social beliefs and traditions about birth                                       |                                                                                                                                                                                                                                                                                                                                                                                                                                                                                                                                                                                                                                                                                                                                                                                                                                                                                                                                                                                                                                                                                                                                                                                                                                                                                                                                                                                                                                                              |
| Signs and behaviours of labour progress; factors that impede labour progress                 |                                                                                                                                                                                                                                                                                                                                                                                                                                                                                                                                                                                                                                                                                                                                                                                                                                                                                                                                                                                                                                                                                                                                                                                                                                                                                                                                                                                                                                                              |
| Methods of assessing fetus during labour                                                     |                                                                                                                                                                                                                                                                                                                                                                                                                                                                                                                                                                                                                                                                                                                                                                                                                                                                                                                                                                                                                                                                                                                                                                                                                                                                                                                                                                                                                                                              |

## Knowledge, skills and behaviours according to ICM Essential Competencies

| <b>Subject/topics</b><br><i>Manage a safe spontaneous vaginal birth and prevent complications</i>    |                                                                                                                                                                                                                                                                                                                                                                                                                                                                                                                                                                                                                                                                                                                                                                                                                                                                                             |
|------------------------------------------------------------------------------------------------------|---------------------------------------------------------------------------------------------------------------------------------------------------------------------------------------------------------------------------------------------------------------------------------------------------------------------------------------------------------------------------------------------------------------------------------------------------------------------------------------------------------------------------------------------------------------------------------------------------------------------------------------------------------------------------------------------------------------------------------------------------------------------------------------------------------------------------------------------------------------------------------------------|
| <b>Knowledge</b>                                                                                     | <b>Skills and behaviours</b>                                                                                                                                                                                                                                                                                                                                                                                                                                                                                                                                                                                                                                                                                                                                                                                                                                                                |
| Methods of conducting birth to protect perineal integrity                                            | <ul style="list-style-type: none"> <li>• Support the woman to give birth in her position of choice</li> <li>• Ensure presence of clean necessary supplies and source of warmth</li> <li>• Coach woman about pushing to control expulsion of presenting part, avoid routine episiotomy</li> <li>• Undertake appropriate maneuvers and use maternal position to facilitate vertex, face, or breech birth</li> <li>• Delay cord clamping</li> <li>• Manage nuchal cord</li> <li>• Assess immediate condition of newborn</li> <li>• Provide skin to skin contact and warm environment</li> <li>• Deliver placenta and membranes and inspect for completeness</li> <li>• Assess uterine tone, maintain firm contraction, and estimate and record maternal blood loss</li> <li>• Inspect vaginal and perineal areas for trauma, and repair as needed, following policies and protocols</li> </ul> |
| Evidence about conduct of third stage, including use of uterotonics                                  |                                                                                                                                                                                                                                                                                                                                                                                                                                                                                                                                                                                                                                                                                                                                                                                                                                                                                             |
| Potential complications and their immediate treatment e.g. shoulder dystocia, and excessive bleeding |                                                                                                                                                                                                                                                                                                                                                                                                                                                                                                                                                                                                                                                                                                                                                                                                                                                                                             |
| Signs of placental separation; appearance of normal placenta, membranes, and umbilical cord          |                                                                                                                                                                                                                                                                                                                                                                                                                                                                                                                                                                                                                                                                                                                                                                                                                                                                                             |
| Types of perineal and vaginal trauma requiring repair and suturing techniques                        |                                                                                                                                                                                                                                                                                                                                                                                                                                                                                                                                                                                                                                                                                                                                                                                                                                                                                             |

**Knowledge, skills and behaviours according to ICM Essential Competencies**

| <b>Subject/topics</b><br><i>Provide care of the newborn immediately after birth</i> |                                                                                                                                                                                                                                                                                                                                                                                                                                                                                                                                                                                                                                                                                                                                                                                                                                                                   |
|-------------------------------------------------------------------------------------|-------------------------------------------------------------------------------------------------------------------------------------------------------------------------------------------------------------------------------------------------------------------------------------------------------------------------------------------------------------------------------------------------------------------------------------------------------------------------------------------------------------------------------------------------------------------------------------------------------------------------------------------------------------------------------------------------------------------------------------------------------------------------------------------------------------------------------------------------------------------|
| <b>Knowledge</b>                                                                    | <b>Skills and behaviours</b>                                                                                                                                                                                                                                                                                                                                                                                                                                                                                                                                                                                                                                                                                                                                                                                                                                      |
| Normal transition to extra-uterine environment                                      | <ul style="list-style-type: none"> <li>• Use standardized method to assess newborn condition in the first minutes of life (Apgar or other); refer if needed</li> <li>• Institute actions to support breathing and oxygenation</li> <li>• Provide a safe warm environment for initiating breastfeeding and attachment (bonding) in the first hour of life</li> <li>• Conduct a complete physical examination of newborn in presence of mother/family; explain findings and expected changes e.g. colour of extremities, moulding of head. Refer for abnormal findings.</li> <li>• Institute newborn prophylaxis e.g. ophthalmic infection, and hemorrhagic disease, according to policies and guidelines</li> <li>• Promote care by mother, frequent feeding and close observation</li> <li>• Involve partner/support persons in providing newborn care</li> </ul> |
| Scoring systems to assess newborn status                                            |                                                                                                                                                                                                                                                                                                                                                                                                                                                                                                                                                                                                                                                                                                                                                                                                                                                                   |
| Signs indicating need for immediate actions to assist transition                    |                                                                                                                                                                                                                                                                                                                                                                                                                                                                                                                                                                                                                                                                                                                                                                                                                                                                   |
| Appearance and behaviour of healthy newborn infant                                  |                                                                                                                                                                                                                                                                                                                                                                                                                                                                                                                                                                                                                                                                                                                                                                                                                                                                   |
| Method of assessing gestational age of newborn infant                               |                                                                                                                                                                                                                                                                                                                                                                                                                                                                                                                                                                                                                                                                                                                                                                                                                                                                   |
| Needs of small for gestational age and low birth weight infants                     |                                                                                                                                                                                                                                                                                                                                                                                                                                                                                                                                                                                                                                                                                                                                                                                                                                                                   |
