# Supplementary material for: Assessment of midwifery care providers intrapartum care competencies, in four sub-Saharan countries: a mixed-method study protocol
Source: PubMed Central journal article supplement (PMC7912468; doi:10.1186/s12978-021-01109-8), 2021-02-27
Supplement: 12978_2021_1109_MOESM5_ESM.pdf [file 12978_2021_1109_MOESM5_ESM.pdf]

## Checklists to observe admission and childbirth related to the roleplays (WP3\_Tool 3/2)

### Unique identifier for health facilities

- Uganda: UG (hospital; UG/01, UG/02, UG/03, UG/04)
- Malawi: MW (hospital; MW/01, MW/02, MW/03, MW/04)
- Benin: BJ (hospital; BJ/01, BJ/02, BJ/03, BJ/04)
- Tanzania: TZ (hospital; TZ/01, TZ/02, TZ/03, TZ/04)

**Unique identifier for health care providers:** H for any health care provider

### Tool WP3: 3/2 (part 2 of 2)

Country   
Hospital   
Tool /  
Type **H**  
Participant #####  
///**H**/###

**Observer: Name** (capital letters) \_\_\_\_\_ **Signature** \_\_\_\_\_ **Date:** \_\_\_/\_\_\_/

**Supervisor: Name** (capital letters) \_\_\_\_\_ **Signature** \_\_\_\_\_ **Date:** \_\_\_/\_\_\_/

**Data entry personnel: Name** (capital letters) \_\_\_\_\_ **Signature** \_\_\_\_\_ **Date:** \_\_\_/\_\_\_/

### Operational definition:

**Done:** Performs the step or task according to the standard procedure or guidelines.

**Not done:** Unable to perform the step or task according to the standard procedure or guidelines.

**Not applicable:** Step or task not applicable for Mary during evaluation by observer.

| PERFORMANCE STANDARDS                                                                                                                                                                                                                                                                        | No                                | Variable name                                               | VERIFICATION CRITERIA                                                                                               | Observation Done=1, Not done=0, Not applicable=9 | COMMENTS |
|----------------------------------------------------------------------------------------------------------------------------------------------------------------------------------------------------------------------------------------------------------------------------------------------|-----------------------------------|-------------------------------------------------------------|---------------------------------------------------------------------------------------------------------------------|--------------------------------------------------|----------|
| <b>Role play 1_admission</b>                                                                                                                                                                                                                                                                 |                                   |                                                             |                                                                                                                     |                                                  |          |
| <b>Section 1. Admission</b><br><br><i>Scenario 1:</i><br><i>Mary is a 28-year-old para 2</i><br><br><i>She is 38+6 weeks pregnant and has just presented at your health care facility with a history of contractions for the past 2 hours. Please perform an initial assessment of Mary.</i> | 1                                 | s1q1                                                        | When assessing Mary, the provider; determines if active labour has started (fetal wellbeing, perspiration, anxiety) |                                                  |          |
|                                                                                                                                                                                                                                                                                              | Asks Mary whether she has or had: |                                                             |                                                                                                                     |                                                  |          |
|                                                                                                                                                                                                                                                                                              | 2                                 | s1q2                                                        | Vaginal bleeding                                                                                                    |                                                  |          |
|                                                                                                                                                                                                                                                                                              | 3                                 | s1q3                                                        | Loss of fluid from vagina                                                                                           |                                                  |          |
|                                                                                                                                                                                                                                                                                              | 4                                 | s1q4                                                        | Convulsions                                                                                                         |                                                  |          |
|                                                                                                                                                                                                                                                                                              | 5                                 | s1q5                                                        | Severe headache and blurred vision                                                                                  |                                                  |          |
|                                                                                                                                                                                                                                                                                              | 6                                 | s1q6                                                        | Severe abdominal pain                                                                                               |                                                  |          |
|                                                                                                                                                                                                                                                                                              | 7                                 | s1q7                                                        | Respiratory difficulty                                                                                              |                                                  |          |
|                                                                                                                                                                                                                                                                                              | 8                                 | s1q8                                                        | Fever                                                                                                               |                                                  |          |
|                                                                                                                                                                                                                                                                                              | 9                                 | s1q9                                                        | Records the information on Mary's clinical history                                                                  |                                                  |          |
| 10                                                                                                                                                                                                                                                                                           | s1q10                             | Refers Mary after providing immediate treatment if required |                                                                                                                     |                                                  |          |

| PERFORMANCE STANDARDS                                                                          | No                          | Variable name | VERIFICATION CRITERIA                                                                                                                 | Observation Done=1, Not done=0, Not applicable=9 | COMMENTS |
|------------------------------------------------------------------------------------------------|-----------------------------|---------------|---------------------------------------------------------------------------------------------------------------------------------------|--------------------------------------------------|----------|
| <b>Section 2. The provider treats Mary in a cordial manner.</b>                                | 1                           | s2q1          | Greets Mary and her husband or companion in a cordial manner and introduces her/himself                                               |                                                  |          |
|                                                                                                | 2                           | s2q2          | Ensures that she/he speaks in easy-to-understand lay language (does not use technical words) with Mary                                |                                                  |          |
|                                                                                                | 3                           | s2q3          | Explains to Mary and her companion the assessment procedures and asks for consent to perform them                                     |                                                  |          |
|                                                                                                | 4                           | s2q4          | Encourages Mary and her companion to ask questions                                                                                    |                                                  |          |
|                                                                                                | 5                           | s2q5          | Listens to what the Mary and her companion have to say                                                                                |                                                  |          |
|                                                                                                | 6                           | s2q6          | Responds to questions and concerns                                                                                                    |                                                  |          |
|                                                                                                | 7                           | s2q7          | Provides emotional support and reassurance                                                                                            |                                                  |          |
|                                                                                                | 8                           | s2q8          | Responds to Mary's immediate needs (thirst, hunger, cold/hot, need to urinate, etc.)                                                  |                                                  |          |
| <b>Section 3. The provider properly reviews and fills out the clinical history about Mary.</b> | 1                           | s3q1          | Asks and records Mary's clinical history following information in a confidential and private environment and in a non-judgemental way |                                                  |          |
|                                                                                                | 2                           | s3q2          | Age of Mary [in this skill drill it is 28 years]                                                                                      |                                                  |          |
|                                                                                                | Previous obstetric history: |               |                                                                                                                                       |                                                  |          |
|                                                                                                | 3                           | s3q3          | Number of pregnancies                                                                                                                 |                                                  |          |
|                                                                                                | 4                           | s3q4          | Number of abortions                                                                                                                   |                                                  |          |
|                                                                                                | 5                           | s3q5          | Number of normal births                                                                                                               |                                                  |          |
|                                                                                                | 6                           | s3q6          | Number of caesarean sections                                                                                                          |                                                  |          |

| PERFORMANCE STANDARDS | No                                                                        | Variable name | VERIFICATION CRITERIA                                                       | Observation Done=1, Not done=0, Not applicable=9 | COMMENTS |  |
|-----------------------|---------------------------------------------------------------------------|---------------|-----------------------------------------------------------------------------|--------------------------------------------------|----------|--|
|                       | 7                                                                         | s3q7          | Number of children born alive and still alive                               |                                                  |          |  |
|                       | 8                                                                         | s3q8          | Number of still births                                                      |                                                  |          |  |
|                       | 9                                                                         | s3q9          | Any maternal complication in any previous pregnancy                         |                                                  |          |  |
|                       | 10                                                                        | s3q10         | Date and outcome of last pregnancy                                          |                                                  |          |  |
|                       | Other general medical problems (for diabetes, hypertension, asthma etc.): |               |                                                                             |                                                  |          |  |
|                       | 11                                                                        | s3q11         | Any medication                                                              |                                                  |          |  |
|                       | 12                                                                        | s3q12         | Use of alternative medications or herbs                                     |                                                  |          |  |
|                       | 13                                                                        | s3q13         | Receiving treatment for tuberculosis and/or HIV                             |                                                  |          |  |
|                       | Gestational age – ask or calculate:                                       |               |                                                                             |                                                  |          |  |
|                       | 14                                                                        | s3q14         | Last menstrual period (LMP)                                                 |                                                  |          |  |
|                       | 15                                                                        | s3q15         | Expected date of delivery (EDD)                                             |                                                  |          |  |
|                       | Contractions                                                              |               |                                                                             |                                                  |          |  |
|                       | 16                                                                        | s3q16         | Avoids asking questions during contractions                                 |                                                  |          |  |
|                       | 17                                                                        | s3q17         | Asks Mary about when her labour/when the painful regular contractions began |                                                  |          |  |
|                       | 18                                                                        | s3q18         | Frequency and strength of the contractions                                  |                                                  |          |  |
|                       | Asks about Mary's "bag of waters"/membrane                                |               |                                                                             |                                                  |          |  |
|                       | 19                                                                        | s3q19         | When the water broke?                                                       |                                                  |          |  |
|                       | 20                                                                        | s3q20         | What colour the water had?                                                  |                                                  |          |  |

| PERFORMANCE STANDARDS                                                                                              | No                                                              | Variable name                     | VERIFICATION CRITERIA                                                                                   | Observation Done=1, Not done=0, Not applicable=9 | COMMENTS |
|--------------------------------------------------------------------------------------------------------------------|-----------------------------------------------------------------|-----------------------------------|---------------------------------------------------------------------------------------------------------|--------------------------------------------------|----------|
|                                                                                                                    | 21                                                              | s3q21                             | What smell the water had?                                                                               |                                                  |          |
|                                                                                                                    | 22                                                              | s3q22                             | Whether Mary feels the baby's movements                                                                 |                                                  |          |
|                                                                                                                    | 23                                                              | s3q23                             | Records the information on clinical history form                                                        |                                                  |          |
| <b>Section 4. The provider properly conducts the physical examination between contractions and if time allows.</b> | 1                                                               | s4q1                              | Helps Mary onto the examination table/bed                                                               |                                                  |          |
|                                                                                                                    | Ensures privacy during the entire process of provision of care: |                                   |                                                                                                         |                                                  |          |
|                                                                                                                    | 2                                                               | s4q2                              | Ensures privacy with a screen or curtain to separate the woman from others, at least during examination |                                                  |          |
|                                                                                                                    | 3                                                               | s4q3                              | Ensures that Mary remains covered with her robe or clothing                                             |                                                  |          |
|                                                                                                                    | 4                                                               | s4q4                              | Asks Mary to urinate (tests urine for albumin and sugar)                                                |                                                  |          |
|                                                                                                                    | 5                                                               | s4q5                              | Washes hands                                                                                            |                                                  |          |
|                                                                                                                    | 6                                                               | s4q6                              | Explains each step of the examination to Mary using easy-to-understand language                         |                                                  |          |
|                                                                                                                    | Takes or delegates vital signs to assistant:                    |                                   |                                                                                                         |                                                  |          |
|                                                                                                                    | 7                                                               | s4q7                              | Temperature                                                                                             |                                                  |          |
|                                                                                                                    | 8                                                               | s4q8                              | Blood pressure (BP)                                                                                     |                                                  |          |
|                                                                                                                    | 9                                                               | s4q9                              | Pulse                                                                                                   |                                                  |          |
|                                                                                                                    | 10                                                              | s4q10                             | Respiratory rate                                                                                        |                                                  |          |
|                                                                                                                    | 11                                                              | s4q11                             | Oedema                                                                                                  |                                                  |          |
| 12                                                                                                                 | s4q12                                                           | Checks the conjunctiva for anemia |                                                                                                         |                                                  |          |

| PERFORMANCE STANDARDS                                                                            | No                                                             | Variable name | VERIFICATION CRITERIA                                                                                                        | Observation Done=1, Not done=0, Not applicable=9 | COMMENTS |
|--------------------------------------------------------------------------------------------------|----------------------------------------------------------------|---------------|------------------------------------------------------------------------------------------------------------------------------|--------------------------------------------------|----------|
|                                                                                                  | 13                                                             | s4q13         | Tests blood for haemoglobin if anemia suspected                                                                              |                                                  |          |
|                                                                                                  | 14                                                             | s4q14         | Observes Mary's emotional response to labour                                                                                 |                                                  |          |
| <b>Section 5. The provider properly conducts the obstetric examination between contractions.</b> | 1                                                              | s5q1          | Observes the shape and size of the abdomen and checks for the presence of scars                                              |                                                  |          |
|                                                                                                  | 2                                                              | s5q2          | Determines fundal height, fetal lie and presentation, engagement of presenting part                                          |                                                  |          |
|                                                                                                  | 3                                                              | s5q3          | Evaluates uterine contractions (frequency, strength and duration over a 10-minute period)                                    |                                                  |          |
|                                                                                                  | 4                                                              | s5q4          | Auscultates fetal heart rate (FHR)                                                                                           |                                                  |          |
|                                                                                                  | 5                                                              | s5q5          | Records the results of the obstetric examination on the clinical history form                                                |                                                  |          |
| <b>Section 6. The provider properly conducts a vaginal examination.</b>                          | 1                                                              | s6q1          | Puts on a clean plastic or rubber apron                                                                                      |                                                  |          |
|                                                                                                  | 2                                                              | s6q2          | Performs hand hygiene and puts sterile/HLD gloves on both hands                                                              |                                                  |          |
|                                                                                                  | 3                                                              | s6q3          | Asks for permission to perform a vaginal examination. Examines the vulva (ulcers, blood, liquid, secretion, presenting part) |                                                  |          |
|                                                                                                  | 4                                                              | s6q4          | Cleanses the perineum with nonalcoholic antiseptic solution using the hand that will not be used to perform the examination  |                                                  |          |
|                                                                                                  | Performs per vaginal examination following standard technique: |               |                                                                                                                              |                                                  |          |
|                                                                                                  | 5                                                              | s6q5          | Gently inserts two lubricated fingers of the examining hand into the vagina                                                  |                                                  |          |
|                                                                                                  | 6                                                              | s6q6          | Notes the length, texture and dilatation of the cervix                                                                       |                                                  |          |

| PERFORMANCE STANDARDS           | No | Variable name | VERIFICATION CRITERIA                                                                                                                                                                                                     | Observation Done=1, Not done=0, Not applicable=9 | COMMENTS |
|---------------------------------|----|---------------|---------------------------------------------------------------------------------------------------------------------------------------------------------------------------------------------------------------------------|--------------------------------------------------|----------|
|                                 | 7  | s6q7          | Notes if the membranes are intact, or if they have ruptured, ensures the cord has not prolapsed                                                                                                                           |                                                  |          |
|                                 | 8  | s6q8          | Measures the level of the presenting part in centimeters above or below Mary's ischial spines                                                                                                                             |                                                  |          |
|                                 | 9  | s6q9          | Identifies fetal presentation and determines fetal position by palpating the features of the presenting part (e.g. fontanelles in cephalic presentation)                                                                  |                                                  |          |
|                                 | 10 | s6q10         | If gloves are disposable, places them in a waste-container with a plastic liner; OR<br>if they are reusable, immerses them in a 0.5% chlorine solution for at least 10 minutes before transferring them for sterilization |                                                  |          |
|                                 | 11 | s6q11         | Performs hand hygiene after removing gloves                                                                                                                                                                               |                                                  |          |
|                                 | 12 | s6q12         | Record the results of the vaginal examination on the clinical history form                                                                                                                                                |                                                  |          |
| <b>Section 7. Documentation</b> | 1  | s7q1          | Record Mary's information and assessment of findings                                                                                                                                                                      |                                                  |          |

| PERFORMANCE STANDARDS | No | Variable name | VERIFICATION CRITERIA | Observation Done=1, Not done=0, Not applicable=9 | COMMENTS |
|-----------------------|----|---------------|-----------------------|--------------------------------------------------|----------|
|-----------------------|----|---------------|-----------------------|--------------------------------------------------|----------|

| Role play 2_childbirth and 15 minutes postpartum                                                                                                                                                                                                                                                                                                                                                        |    |       |                                                                                                                                                                         |  |  |
|---------------------------------------------------------------------------------------------------------------------------------------------------------------------------------------------------------------------------------------------------------------------------------------------------------------------------------------------------------------------------------------------------------|----|-------|-------------------------------------------------------------------------------------------------------------------------------------------------------------------------|--|--|
| <p><i>Scenario 2:<br/>Mary's labour has progressed normally, and she is now feeling rectal pressure and an urge to push. Assume that Mary is fully dilated.</i></p> <p><i>Please demonstrate the care that you would provide for Mary from this point until 15 minutes following the birth of the baby.</i></p> <p><b>Section 8. The provider assists the woman to have a safe and clean birth.</b></p> | 1  | s8q1  | Preparation of equipment (e.g. delivery kit, oxytocin, gloves etc.). Washes hands thoroughly with soap and water and dries them                                         |  |  |
|                                                                                                                                                                                                                                                                                                                                                                                                         | 2  | s8q2  | Puts sterile or HLD gloves on both hands                                                                                                                                |  |  |
|                                                                                                                                                                                                                                                                                                                                                                                                         | 3  | s8q3  | Puts on personal protective equipment (plastic/rubber apron)                                                                                                            |  |  |
|                                                                                                                                                                                                                                                                                                                                                                                                         | 4  | s8q4  | Cleanses the perineum with water or a nonalcoholic antiseptic solution after asking for permission to do so                                                             |  |  |
|                                                                                                                                                                                                                                                                                                                                                                                                         | 5  | s8q5  | Monitors, or has an assistant monitor, FHR every five minutes during second stage                                                                                       |  |  |
|                                                                                                                                                                                                                                                                                                                                                                                                         | 6  | s8q6  | Supports Mary to bear down when she feels the desire in the position she chooses (does not force her to bear down)                                                      |  |  |
|                                                                                                                                                                                                                                                                                                                                                                                                         | 7  | s8q7  | Performs an episiotomy only if necessary (breech, shoulder dystocia, forceps, vacuum, poorly healed 3rd or 4th degree tear, or fetal distress) as the perineum distends |  |  |
|                                                                                                                                                                                                                                                                                                                                                                                                         | 8  | s8q8  | Administers local anaesthesia                                                                                                                                           |  |  |
|                                                                                                                                                                                                                                                                                                                                                                                                         | 9  | s8q9  | Waits to perform episiotomy until the perineum is thinned out and the baby's head is visible during a contraction                                                       |  |  |
|                                                                                                                                                                                                                                                                                                                                                                                                         | 10 | s8q10 | If delivery of the head does not follow immediately, applies pressure to the episiotomy site between contractions to minimize bleeding                                  |  |  |



| PERFORMANCE STANDARDS | No | Variable name | VERIFICATION CRITERIA                                                                                                                                                                                                                                                                         | Observation Done=1, Not done=0, Not applicable=9 | COMMENTS |
|-----------------------|----|---------------|-----------------------------------------------------------------------------------------------------------------------------------------------------------------------------------------------------------------------------------------------------------------------------------------------|--------------------------------------------------|----------|
|                       | 11 | s8q11         | Allows the head to spontaneously crown while guarding the perineum and episiotomy (if given)                                                                                                                                                                                                  |                                                  |          |
|                       | 12 | s8q12         | After the emergence of the head, asks Mary to briefly refrain from bearing down (open mouth breathing) and explains how to perform open mouth breathing                                                                                                                                       |                                                  |          |
|                       | 13 | s8q13         | After fetal head is born, allows the neck to gradually extend and quickly palpates to determine if cord around the neck;<br>- if it is loose, slides it over the baby's head;<br>- if it is very tight, clamps it in two places and cuts it before unravelling it from around the baby's neck |                                                  |          |
|                       | 14 | s8q14         | Assists Mary in birthing the baby - allows spontaneous restitution and external rotation of the head without manipulation                                                                                                                                                                     |                                                  |          |
|                       | 15 | s8q15         | Guides the baby's head and chest in an upward curve until the posterior shoulder has emerged over the perineum                                                                                                                                                                                |                                                  |          |
|                       | 16 | s8q16         | Holds the baby around the chest to aid the birth of the trunk and lift it towards Mary's abdomen                                                                                                                                                                                              |                                                  |          |
|                       | 17 | s8q17         | Places the baby on a dry towel/cloth on Mary's abdomen                                                                                                                                                                                                                                        |                                                  |          |
|                       | 18 | s8q18         | Cleans the baby's mouth and nose using a sterile gauze if meconium present                                                                                                                                                                                                                    |                                                  |          |
|                       | 19 | s8q19         | Wipes the baby's eyes with a clean piece of cloth                                                                                                                                                                                                                                             |                                                  |          |
|                       | 20 | s8q20         | Clamps and cuts the cord using clean/sterile blade/ instrument within 1-3 minutes of the birth and cut it close to the perineum                                                                                                                                                               |                                                  |          |

| PERFORMANCE STANDARDS                                                                                                               | No                                                                   | Variable name                                 | VERIFICATION CRITERIA                                                                                               | Observation Done=1, Not done=0, Not applicable=9 | COMMENTS |
|-------------------------------------------------------------------------------------------------------------------------------------|----------------------------------------------------------------------|-----------------------------------------------|---------------------------------------------------------------------------------------------------------------------|--------------------------------------------------|----------|
|                                                                                                                                     | 21                                                                   | s8q21                                         | Informs Mary of the sex of her child (with same enthusiasm if male or female)                                       |                                                  |          |
|                                                                                                                                     | 22                                                                   | s8q22                                         | Assists Mary to move her child up to her chest for skin-to-skin contact                                             |                                                  |          |
| <b>Section 9. The provider properly conducts a rapid initial assessment and provides immediate newborn resuscitation if needed.</b> | 1                                                                    | s9q1                                          | Receives the baby either by a different provider with separate gloves or by same provider using a new set of gloves |                                                  |          |
|                                                                                                                                     | 2                                                                    | s9q2                                          | Dries the baby with a clean dry towel from head to feet                                                             |                                                  |          |
|                                                                                                                                     | 3                                                                    | s9q3                                          | Discards the used towel and covers the baby including the head with a clean dry towel                               |                                                  |          |
|                                                                                                                                     | 4                                                                    | s9q4                                          | Determines whether the baby is breathing                                                                            |                                                  |          |
|                                                                                                                                     | If the baby does not begin breathing or is breathing with difficulty |                                               |                                                                                                                     |                                                  |          |
|                                                                                                                                     | 5                                                                    | s9q5                                          | Asks assistance                                                                                                     |                                                  |          |
|                                                                                                                                     | If the baby breathes from birth                                      |                                               |                                                                                                                     |                                                  |          |
|                                                                                                                                     | 6                                                                    | s9q6                                          | Facilitates delayed cord clamping (allows 1-3 minutes before clamping and cutting the cord).                        |                                                  |          |
|                                                                                                                                     | 7                                                                    | s9q7                                          | If the baby is breathing normally, place the baby in skin-to-skin contact on Mary's chest or abdomen                |                                                  |          |
|                                                                                                                                     | 8                                                                    | s9q8                                          | Encourages "Baby Crawl" practice and immediate breastfeeding                                                        |                                                  |          |
| 9                                                                                                                                   | s9q9                                                                 | Notes the date and time of birth              |                                                                                                                     |                                                  |          |
| 10                                                                                                                                  | s9q10                                                                | Informs the attendant of the baby's condition |                                                                                                                     |                                                  |          |

| PERFORMANCE STANDARDS                                                                               | No | Variable name | VERIFICATION CRITERIA                                                                                                                                                                                                                                       | Observation Done=1, Not done=0, Not applicable=9 | COMMENTS |
|-----------------------------------------------------------------------------------------------------|----|---------------|-------------------------------------------------------------------------------------------------------------------------------------------------------------------------------------------------------------------------------------------------------------|--------------------------------------------------|----------|
| <b>Section 10. The provider adequately performs active management of the third stage of labour.</b> | 1  | s10q1         | Touches Mary's abdomen to rule out the presence of a second baby (without stimulating contractions)                                                                                                                                                         |                                                  |          |
|                                                                                                     | 2  | s10q2         | Give inj. Oxytocin 10 units direct I/M and wait for next contraction within one minute after birth of the baby.                                                                                                                                             |                                                  |          |
|                                                                                                     | 3  | s10q3         | Holds the cord along with clamp and provides controlled cord traction/sustained downward traction                                                                                                                                                           |                                                  |          |
|                                                                                                     | 4  | s10q4         | Repeats controlled cord traction while simultaneously applying counter pressure above pubis to guard uterus (places the other hand above the level of the symphysis pubis with hand facing towards the umbilicus to provide counter traction on the uterus) |                                                  |          |
|                                                                                                     | 5  | s10q5         | Applies steady tension by pulling the cord firmly and maintaining pressure (jerky movements and force must be avoided)                                                                                                                                      |                                                  |          |
|                                                                                                     | 6  | s10q6         | When the placenta is visible at the vulva holds the placenta with both hands, assists in the expulsion of the placenta, by turning it over in the hands, without applying traction,                                                                         |                                                  |          |
|                                                                                                     | 7  | s10q7         | Uses a gentle and upward and downward movement or twisting action to deliver the membranes, "teasing out" the membranes                                                                                                                                     |                                                  |          |
|                                                                                                     | 8  | s10q8         | Checks whether the uterus is well contracted                                                                                                                                                                                                                |                                                  |          |
|                                                                                                     | 9  | s10q9         | Massages the uterus with one hand on a cloth over the abdomen, until the uterus contracts firmly                                                                                                                                                            |                                                  |          |
|                                                                                                     | 10 | s10q10        | Checks the placenta on a clean table or the delivery bed with a good light source: whether all the lobules are present and fit together to see if                                                                                                           |                                                  |          |

| PERFORMANCE STANDARDS                                                          | No | Variable name | VERIFICATION CRITERIA                                                                                                                                                            | Observation Done=1, Not done=0, Not applicable=9 | COMMENTS |
|--------------------------------------------------------------------------------|----|---------------|----------------------------------------------------------------------------------------------------------------------------------------------------------------------------------|--------------------------------------------------|----------|
|                                                                                |    |               | complete (missing cotyledon) and to identify any abnormalities such as aberrant vessels or nodules in the umbilical cord                                                         |                                                  |          |
|                                                                                | 11 | s10q11        | Inspects the membranes for completeness                                                                                                                                          |                                                  |          |
|                                                                                | 12 | s10q12        | Notes the position of insertion of the cord                                                                                                                                      |                                                  |          |
|                                                                                | 13 | s10q13        | Inspect the cut end of the cord for the presence of two arteries and one vein                                                                                                    |                                                  |          |
| <b>Section 11. The provider adequately performs immediate postpartum care.</b> | 1  | s11q1         | Ensures direct strong light into the perineum, wearing gloves, that Mary is in a comfortable position, and swabs are ready                                                       |                                                  |          |
|                                                                                | 2  | s11q2         | Informs and gains consent from Mary to check her perineum                                                                                                                        |                                                  |          |
|                                                                                | 3  | s11q3         | Inspects the lower vagina and perineum for lacerations/tear and checks for increased bleeding from the cervix/cervical tear                                                      |                                                  |          |
|                                                                                | 4  | s11q4         | Gently cleanses the vulva and perineum with clean water or a nonalcoholic antiseptic solution and dries with a clean, soft cloth                                                 |                                                  |          |
|                                                                                | 5  | s11q5         | Sutures tears/episiotomy, if necessary                                                                                                                                           |                                                  |          |
|                                                                                | 6  | s11q6         | Makes sure that Mary is comfortable (clean, hydrated and warmly covered)                                                                                                         |                                                  |          |
| <b>Section 12. Documentation of AMTSL</b>                                      |    |               |                                                                                                                                                                                  |                                                  |          |
|                                                                                | 1  | s12q1         | Performs hand hygiene after removing gloves                                                                                                                                      |                                                  |          |
|                                                                                | 2  | s12q2         | Records relevant details (childbirth, active management of the third stage of Labour (AMTSL), placenta examination, newborn condition, episiotomy (if done) on the Mary's record |                                                  |          |



**Anything from the role play/observations you would like to tell us?**
