# Supplementary material for: Assessment of midwifery care providers intrapartum care competencies, in four sub-Saharan countries: a mixed-method study protocol
Source: Springer Nature journal article supplement (doi:10.1186/s12978-021-01109-8), 2021-02-27
Supplement: MOESM4 [file 18911040]

## Skills drill script

### Section 1: Admission

|                                   |                                                                                                                     |
|-----------------------------------|---------------------------------------------------------------------------------------------------------------------|
| Vaginal bleeding                  | None                                                                                                                |
| Loss of fluid from vagina         | Yes – started losing fluid approximately one hour ago (If the provider asks it is clear and has no offensive smell) |
| Convulsions                       | None                                                                                                                |
| Severe headache or blurred vision | None                                                                                                                |
| Severe abdominal pain             | None – only labour like pains                                                                                       |
| Respiratory difficulty            | None                                                                                                                |
| Fever                             | None                                                                                                                |

### Section 3: Clinical history

|                                                 |                                                                               |
|-------------------------------------------------|-------------------------------------------------------------------------------|
| Age                                             | 28                                                                            |
| <b>Obstetric history</b>                        |                                                                               |
| Number of pregnancies                           | This is my 3 <sup>rd</sup> pregnancy                                          |
| Number of abortions                             | None                                                                          |
| Number of normal births                         | Two                                                                           |
| Number of caesarean sections                    | None                                                                          |
| Number of children born alive and still alive   | Two                                                                           |
| Number of stillbirths                           | None                                                                          |
| Any maternal complication in previous pregnancy | None                                                                          |
| Date and outcome of last pregnancy              | 24.05.2018 SVD, livebirth no maternal or neonatal complications               |
| <b>General medical problems</b>                 |                                                                               |
| Any medication                                  | None                                                                          |
| Use of alternative medication or herbs          | No                                                                            |
| Receiving treatment for TB/HIV                  | No – HIV Negative                                                             |
| <b>Gestational Age</b>                          |                                                                               |
| Last menstrual period (LMP)                     | 07.09.2019                                                                    |
| Expected date of delivery                       | 14.06.2020 (Gest is 38+2)                                                     |
| When did painful regular contractions start?    | Contractions started 5 hours ago, but they have only been regular for 2 hours |
| Frequency and strength of contractions          | 3 contractions in 10 minutes, lasting 50 seconds                              |
| <b>Waters/membranes rupturing</b>               |                                                                               |
| When waters broke                               | One hour ago                                                                  |

|                                  |                                         |
|----------------------------------|-----------------------------------------|
| What colour was the water        | Clear                                   |
| What smell did the waters have   | None                                    |
| Are you feeling baby's movements | Yes – movements are in a normal pattern |

#### Section 4: Physical examination

|                  |                                    |
|------------------|------------------------------------|
| Temperature      | 36.8C                              |
| Blood pressure   | 122/76                             |
| Pulse            | 81                                 |
| Respiratory rate | 18                                 |
| Oedema           | Mild oedema in the feet and ankles |
| Conjunctiva      | Normal – no signs of anaemia       |

#### Section 5: Obstetric examination

|                      |                                                                                           |
|----------------------|-------------------------------------------------------------------------------------------|
| Abdominal appearance | NAD – no scars noted                                                                      |
| Fundal height        | 38cm                                                                                      |
| Fetal lie            | Longitudinal                                                                              |
| Presentation         | Cephalic                                                                                  |
| Engagement           | 2/5 <sup>th</sup> palpable                                                                |
| Contractions         | 3:10 minutes, 50 seconds long, moderate to strong on palpation, good resting tone between |
| Auscultates FH       | 138bpm                                                                                    |

#### Section 6: Vaginal examination

|                              |                                    |
|------------------------------|------------------------------------|
| Length                       | <1cm long (fully effaced)          |
| Texture                      | Soft and stretchy                  |
| Dilation                     | 8cm                                |
| Assess for membranes         | Ruptured and clear liquor draining |
| Check for cord prolapse      | No evidence of cord prolapse       |
| Level of the presenting part | At spines -1                       |
| Fetal presentation           | Cephalic                           |
| Fetal position               | LOA                                |
